# Supplementary material for: Lactobacillus paracasei PS23 Delays Progression of Age-Related Cognitive Decline in Senescence Accelerated Mouse Prone 8 (SAMP8) Mice
Source: MDPI journal article supplement (doi:10.3390/nu10070894), 2018-07-12
Supplement: s1 [file s1]

Supplementary table 1 Criteria for grading score of senescence in mice

| Item                                                 | Define                                                                                                                                                       | Grade 0                             | Grade 1                                                                                                            | Grade 2                                                                                                                                          | Grade 3                                                                                                 | Grade 4                                                            |
|------------------------------------------------------|--------------------------------------------------------------------------------------------------------------------------------------------------------------|-------------------------------------|--------------------------------------------------------------------------------------------------------------------|--------------------------------------------------------------------------------------------------------------------------------------------------|---------------------------------------------------------------------------------------------------------|--------------------------------------------------------------------|
| I) Behavior<br>1. Reactivity                         | The most intensive exploratory response observed within 30 seconds                                                                                           | Natural behavior                    | <b>A.</b> Abnormal gait with no lessening of agility and behavior patterns<br><b>B.</b> Restlessness               | Definite decrease in agility and behavior patterns                                                                                               | Does not move voluntarily but will move if nudged                                                       | Immobile                                                           |
| 2. Passivity                                         | Escape reaction from pinching of the nuchal skin or from hanging by the forelimb                                                                             | Natural escape reaction to pinching | Decrease in escape reaction to pinching                                                                            | Loss of escape reaction to pinching. Preserved righting reaction to manual turn over                                                             | Neither escapes reaction to pinching not righting reaction. Escape reaction to hanging by the forelimb  | Escape reaction nil                                                |
| II) Appearance<br>1. Skin and hair<br>(1) Glossiness | Glossiness                                                                                                                                                   | Natural gloss                       | Decrease in gloss                                                                                                  | Complete disappearance of gloss                                                                                                                  | Complete disappearance of gloss and hair appears dirty                                                  | Complete disappearance of gloss and hair looks very dirty          |
| (2) Coarseness                                       | Coarseness of hair on the head, nucha and dorsum determined according to the number of palpable, fine clumps of hair                                         | No coarseness                       | Coarseness of less than an area of the head                                                                        | Coarseness of less than doubles the area of the head                                                                                             | Coarseness of less than 3 times areas of the head                                                       | Complete disappearance of gloss and hair looks very dirty          |
| (3) Loss of hair                                     | Loss or thinning of hair on the head, nucha and dorsum except for changes due to ulcer or periophthalmic lesions                                             | Neither loss nor thinning of hair   | <b>A.</b> Loss of hair in less than an area of the head<br><b>B.</b> Thinning of hair in less than 1/2 of the area | <b>A.</b> Loss of hair in over one area of the head, less than in 1/4 of total area<br><b>B.</b> Thinning of hair in more than 1/2 of total area | Loss of hair in more than 1/4, in less than 1/2 of total area                                           | Loss of hair in over 1/2 of total area                             |
| (4) Skin ulcers                                      | Ulcer or healed ulcer on entire skin except for changes associated with periophthalmic lesions                                                               | No evidence of ulcer                | Healed ulcer or ulcer with scab                                                                                    | Ulcer without healing tendency, in less than one area of the head                                                                                | Ulcer without healing tendency in more than one area of the head, in less than 1/4 area of all the skin | Ulcer without healing tendency in more than 1/4 area of whole skin |
| 2. Eyes<br>(1) Periophthalmic Lesions                | Catarrhal changes in the periophthalmic area or swelling of the palpebra                                                                                     | No changes                          | Catarrhal changes limited to periophthalmic area or swelling of palpebra                                           | Catarrhal changes extending to nose                                                                                                              | Catarrhal changes extending further                                                                     |                                                                    |
| (2) Corneal opacity                                  | Opaque changes of cornea with rough surface by direct ophthalmoscopy                                                                                         | No opacity                          | Opacity with visible iris                                                                                          | Opacity with visible iris. Positive retinal reflex by transillumination                                                                          | Opacity of entire cornea                                                                                |                                                                    |
| (3) Ulcer of the cornea                              | Opaque changes of cornea with rough surface by direct ophthalmoscopy                                                                                         | No ulcer                            | Linear ulcer corresponding to palpebral fissure                                                                    | Extension of ulcer over most of the area                                                                                                         | Ulcer of entire cornea                                                                                  |                                                                    |
| (4) Cataract                                         | Opaque changes of crystalline lens without retinal reflex by transillumination. Impossible to see because of coexistence of grade 3 corneal opacity or ulcer | Natural reflection                  | Diminished reflection                                                                                              | No reflection                                                                                                                                    |                                                                                                         |                                                                    |
| 3. Spine<br>(1) Lordokyphosis of the spine           | Examined by inspection and palpation                                                                                                                         | Natural anteroposterior curvature   | Increased curvature disappears with digital pressure on the dorsum                                                 | Increased curvature disappears with a combination of manual cephalocaudal traction and digital pressure on the dorsum                            | Permanent curvature                                                                                     |                                                                    |

Supplementary table 2. Behaviours and levels of neural monoamines, antioxidative enzymes, and inflammatory cytokines in pre-aged and aged (the control group) mice

|             |                           | Female           |                | Male           |                |
|-------------|---------------------------|------------------|----------------|----------------|----------------|
|             |                           | Pre-aged         | Aged           | Pre-aged       | Aged           |
| Behaviours  | OF-distance (mm)          | 3,737.8±397.3    | 1,761.7±215.4* | 3,557.3±305.6  | 1,374.7±152.2* |
|             | OF-centre time (s)        | 46.3±3.9         | 32.7±1.6*      | 33.2±3.1       | 16.8±2.0*      |
|             | MWM-target quadrant (s)   | 12.2±1.5         | 7.5±1.4*       | 16.3±2.2       | 9.7±1.8*       |
|             | MWM-opposite quadrant (s) | 4.0±1.3          | 9.4±1.5*       | 5.2±0.6        | 8.8±1.1*       |
| Striatum    | DA (ng/g)                 | 13,145.2±2,290.2 | 4902.8±322.5*  | 13,235.2±447.3 | 5323.2±556.8*  |
|             | DC (ng/g)                 | 629.1±45.3       | 524.2±27.9*    | 623.8±25.8     | 393.3±30.0*    |
|             | 5-HT (ng/g)               | 510.0±14.1       | 214.6±47.4*    | 544.3±9.2      | 193.9±14.4*    |
|             | 5-HIAA (ng/g)             | 408.8±47.7       | 152.8±29.5*    | 491.7±31.0     | 196.7±19.1*    |
| Hippocampus | DA (ng/g)                 | 86.9±10.9        | 40.1±8.7*      | 99.0±4.6       | 36.7±6.7*      |
|             | DC (ng/g)                 | 50.8±4.2         | 30.8±8.8*      | 46.5±3.5       | 20.3±2.1*      |
|             | 5-HT (ng/g)               | 437.8±76.3       | 213.2±52.1*    | 543.0±26.4     | 145.6±10.5*    |
|             | 5-HIAA (ng/g)             | 437.5±45.1       | 253.3±62.4*    | 439.3±25.7     | 168.8±19.4*    |
| Serum       | BDNF (pg/mL)              | 86.0±0.3         | 80.6±0.6*      | 83.6±0.5       | 80.7±0.8*      |
|             | SOD (U/mL)                | 0.50±0.05        | 0.30±0.01*     | 0.58±0.07      | 0.46±0.05*     |
|             | GPx (U/mL)                | 14.1±0.4         | 11.6±0.6*      | 14.7±0.3       | 13.1±0.3*      |
|             | IL-10 (pg/mL)             | 40.8±1.2         | 27.0±0.3*      | 44.8±0.9       | 29.1±1.0*      |
|             | TNF-α (pg/mL)             | 4.7±0.0          | 5.2±0.0*       | 4.8±0.1        | 5.4±0.1*       |
|             | MCP-1 (pg/ml)             | 56.4±2.8         | 91.8±5.0*      | 62.4±4.5       | 91.0±6.1*      |

OF-distance, total distance moved in open field test; OF-centre time, centre staying time in open field test; MWM-target quadrant, target-quadrant staying time in Morris water maze test. MWM-opposite quadrant, target-opposite quadrant staying time in Morris water maze test. \* Significantly different from the pre-control group at  $p < 0.05$ .
